# Supplementary material for: Simply Fabricated Inexpensive Dual-Polymer-Coated Fabry-Perot Interferometer-Based Temperature Sensors with High Sensitivity
Source: MDPI journal article supplement (doi:10.3390/s21227632), 2021-11-17
Supplement: s1 [file s1]

Supplementary

# Simply Fabricated Inexpensive Dual-Polymer-Coated FABRY-Perot Interferometer-Based Temperature Sensors with High Sensitivity

Tejaswi Tanaji Salunkhe <sup>1,†</sup>, Ho Kyung Lee <sup>1,†</sup>, Hyung Wook Choi <sup>2</sup>, Sang Joon Park <sup>1</sup> and Il Tae Kim <sup>1,\*</sup>

<sup>1</sup> Department of Chemical and Biological Engineering, Gachon University, Seongnam-si, 13120 Gyeonggi-do Korea; tejaswisalunkhe235@gmail.com (T.T.S.); ghrud0722@gmail.com (H.K.L.); psj@gachon.ac.kr (S.J.P.)

<sup>2</sup> Department of Electrical Engineering, Gachon University, 13120 Seongnam-si, Gyeonggi-do, Korea; chw@gachon.ac.kr

\* Correspondence: itkim@gachon.ac.kr; Tel.: +82-31-750-8835; Fax: +82-31-750-5363

† Those authors equally contributed to this work.

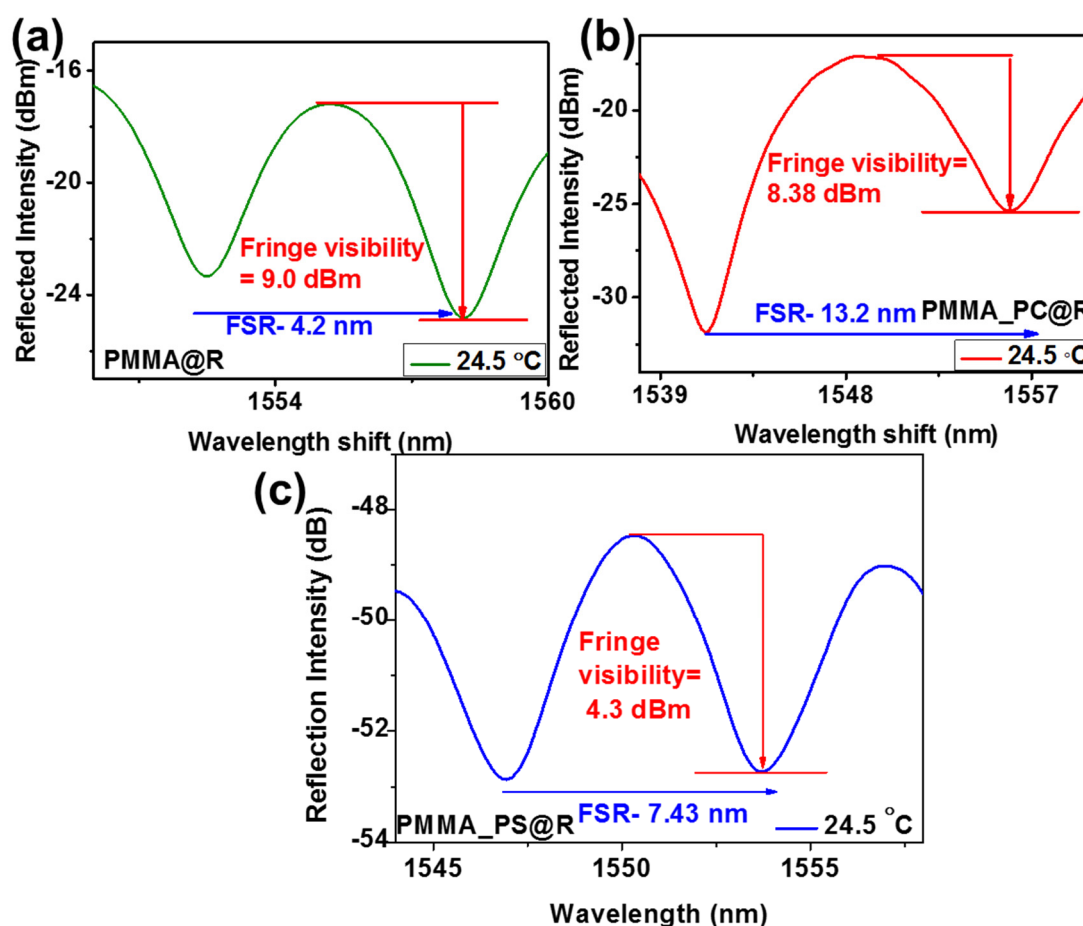

**Figure S1.** Reflected spectra for (a) PMMA@R, (b) PMMA\_PC@R, and (c) PMMA\_PS@R sensors for checking reproducibility.

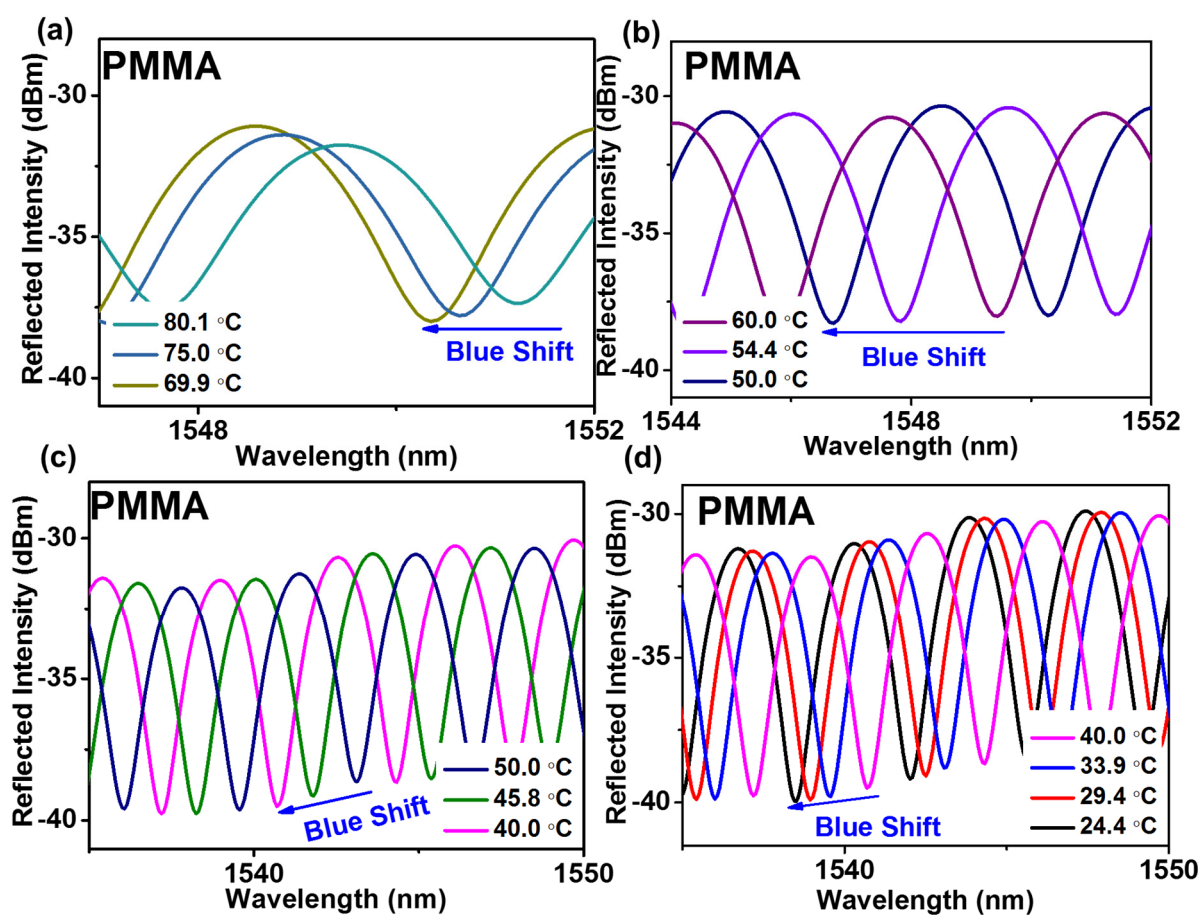

Figure S2. (a-d) Reflection spectra of the PMMA coated sensor in response to a temperature decrease (Blue shift).

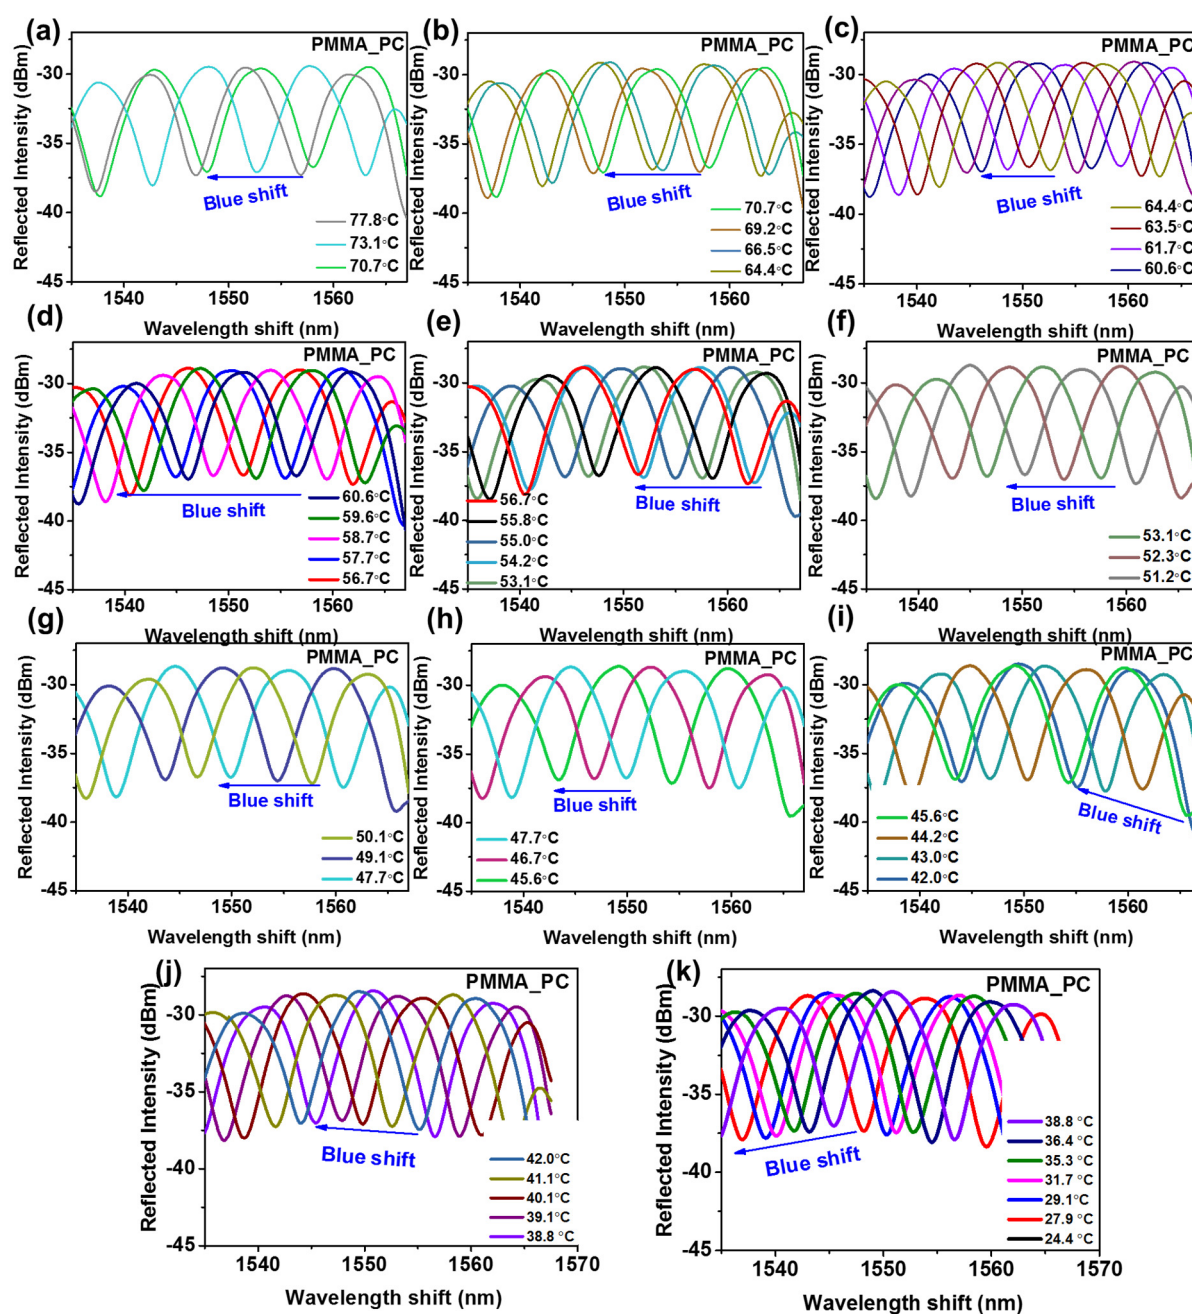

Figure S3. (a-k) Reflection spectra of the PMMA\_PC coated sensor in response to a temperature decrease (Blue shift).

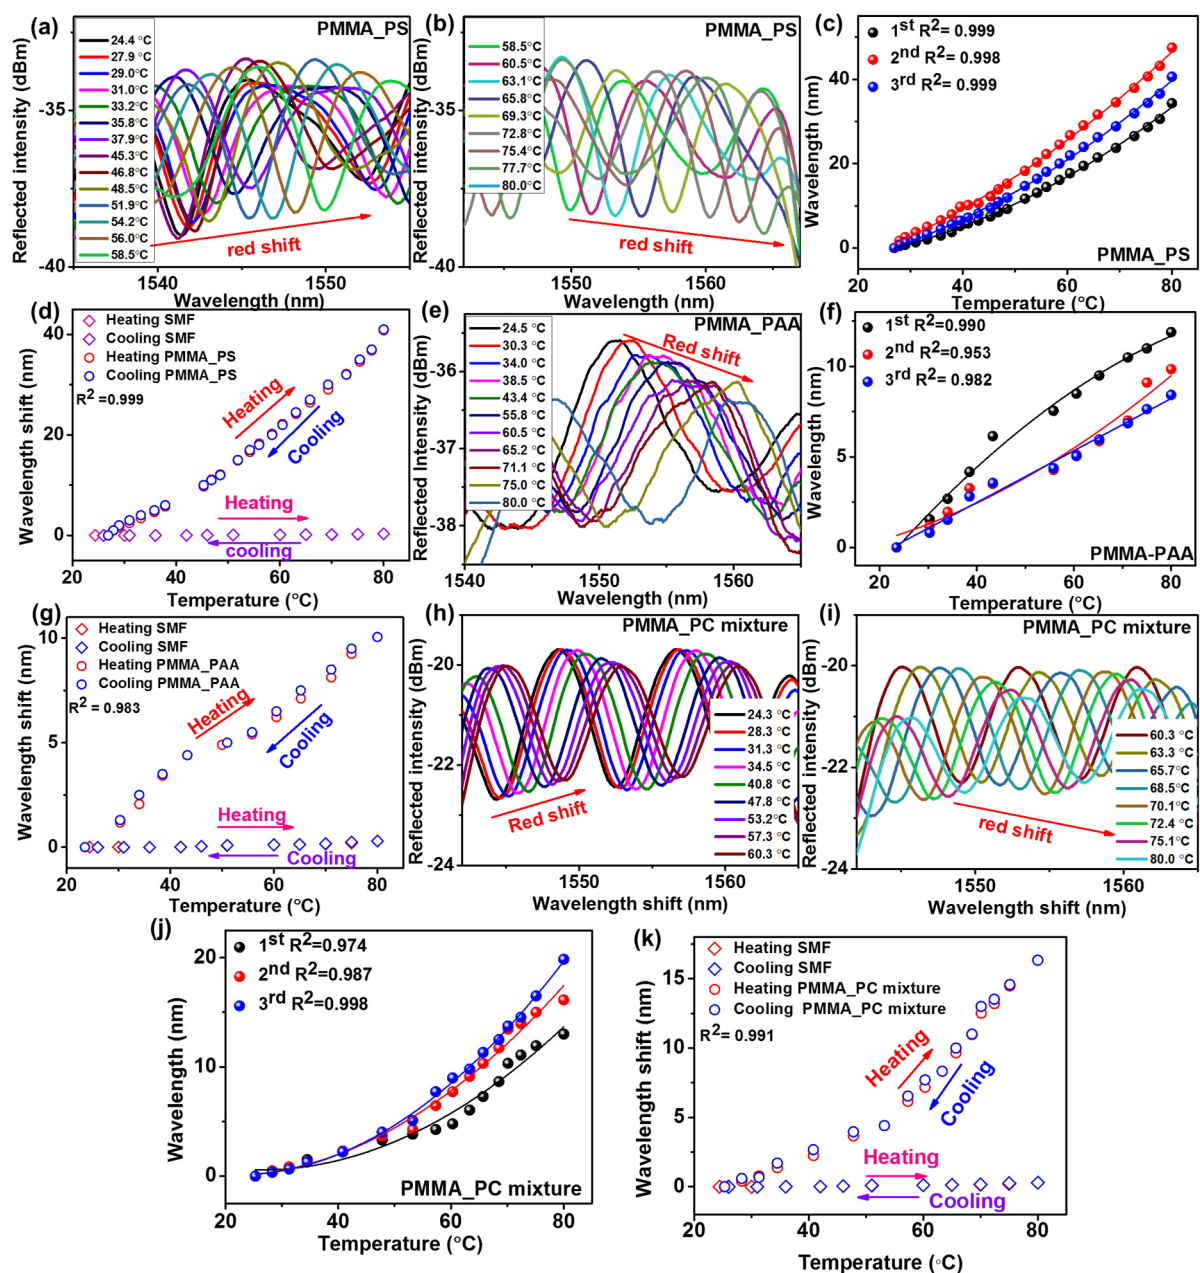

**Figure S4.** (a–b) Reflection spectra of the PMMA\_PS coated sensor in response to a temperature increase (red shift). (c) wavelength shift for three measurements and (d) average wavelength shift of PMMA-PS sensor. (e) reflection spectra of the PMMA\_PAA coated sensor in response to a temperature increase (red shift). (f) wavelength shift for three measurements and (g) average wavelength shift of PMMA-PAA sensor. (h–i) reflection spectra of the PMMA\_PC mixture coated sensor in response to a temperature increase (red shift). (j) wavelength shift for three measurements and (k) average wavelength shift of PMMA-PC mixture sensor.



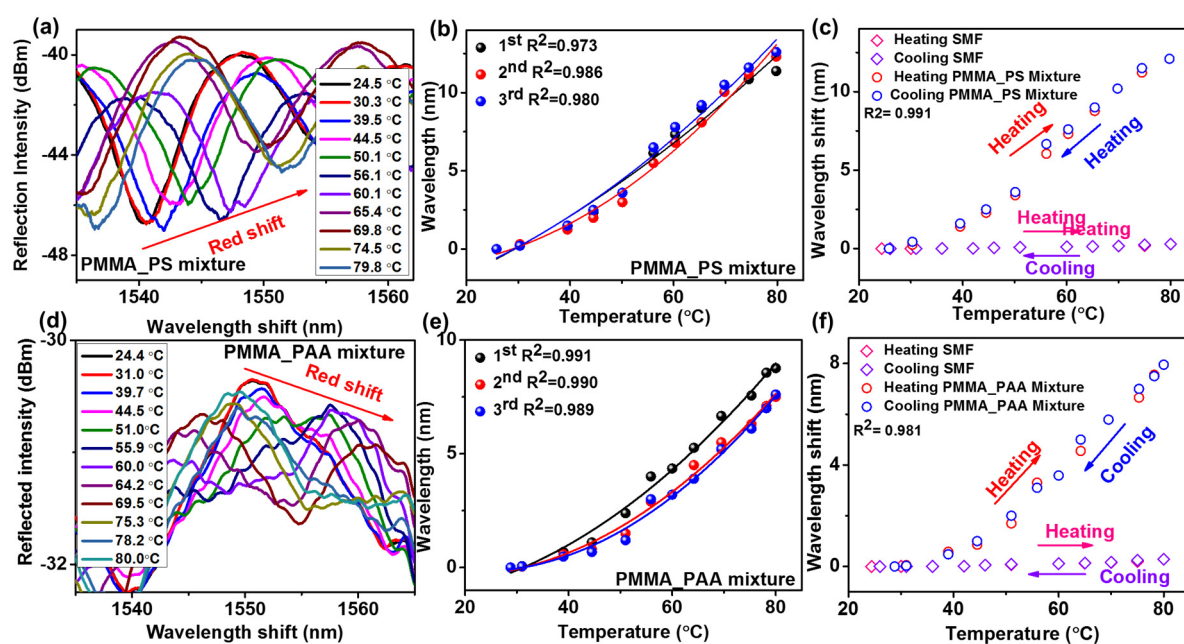

**Figure S5.** (a) Reflection spectra of the PMMA\_PS mixture coated sensor in response to a temperature increase (red shift). (b) wavelength shift for three measurements and (c) average wavelength shift of PMMA-PS mixture sensor. (d) reflection spectra of the PMMA\_PAA mixture coated sensor in response to a temperature increase (red shift). (e) wavelength shift for three measurements and (f) average wavelength shift of PMMA-PAA mixture sensor.

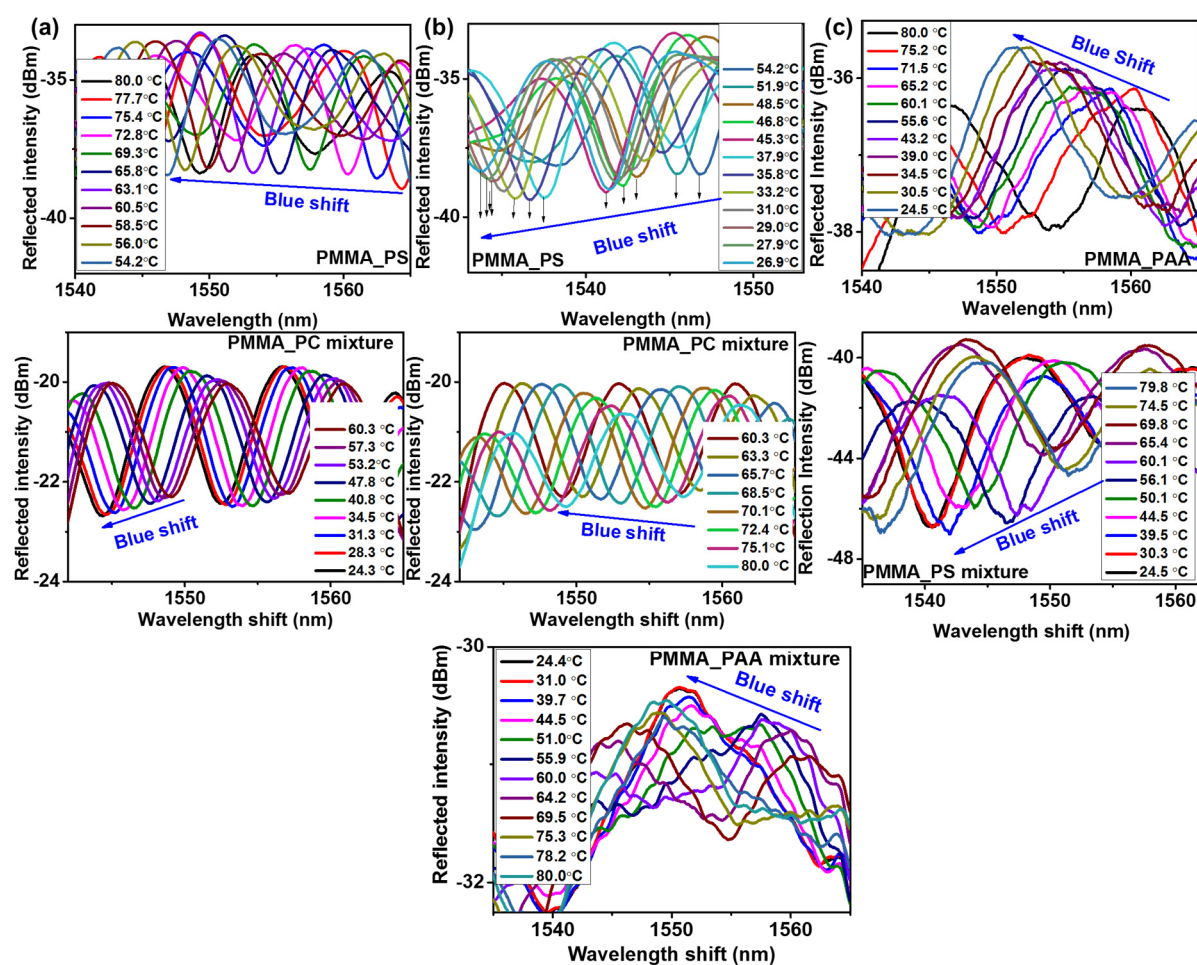

**Figure S6.** The reflection spectra of in response to a temperature decrease (blue shift) (a-b) PMMA\_PS, (c) PMMA\_PAA, (d-e) PMMA\_PC mixture, (f) PMMA-PS mixture, and (g) PMMA\_PAA mixture. .

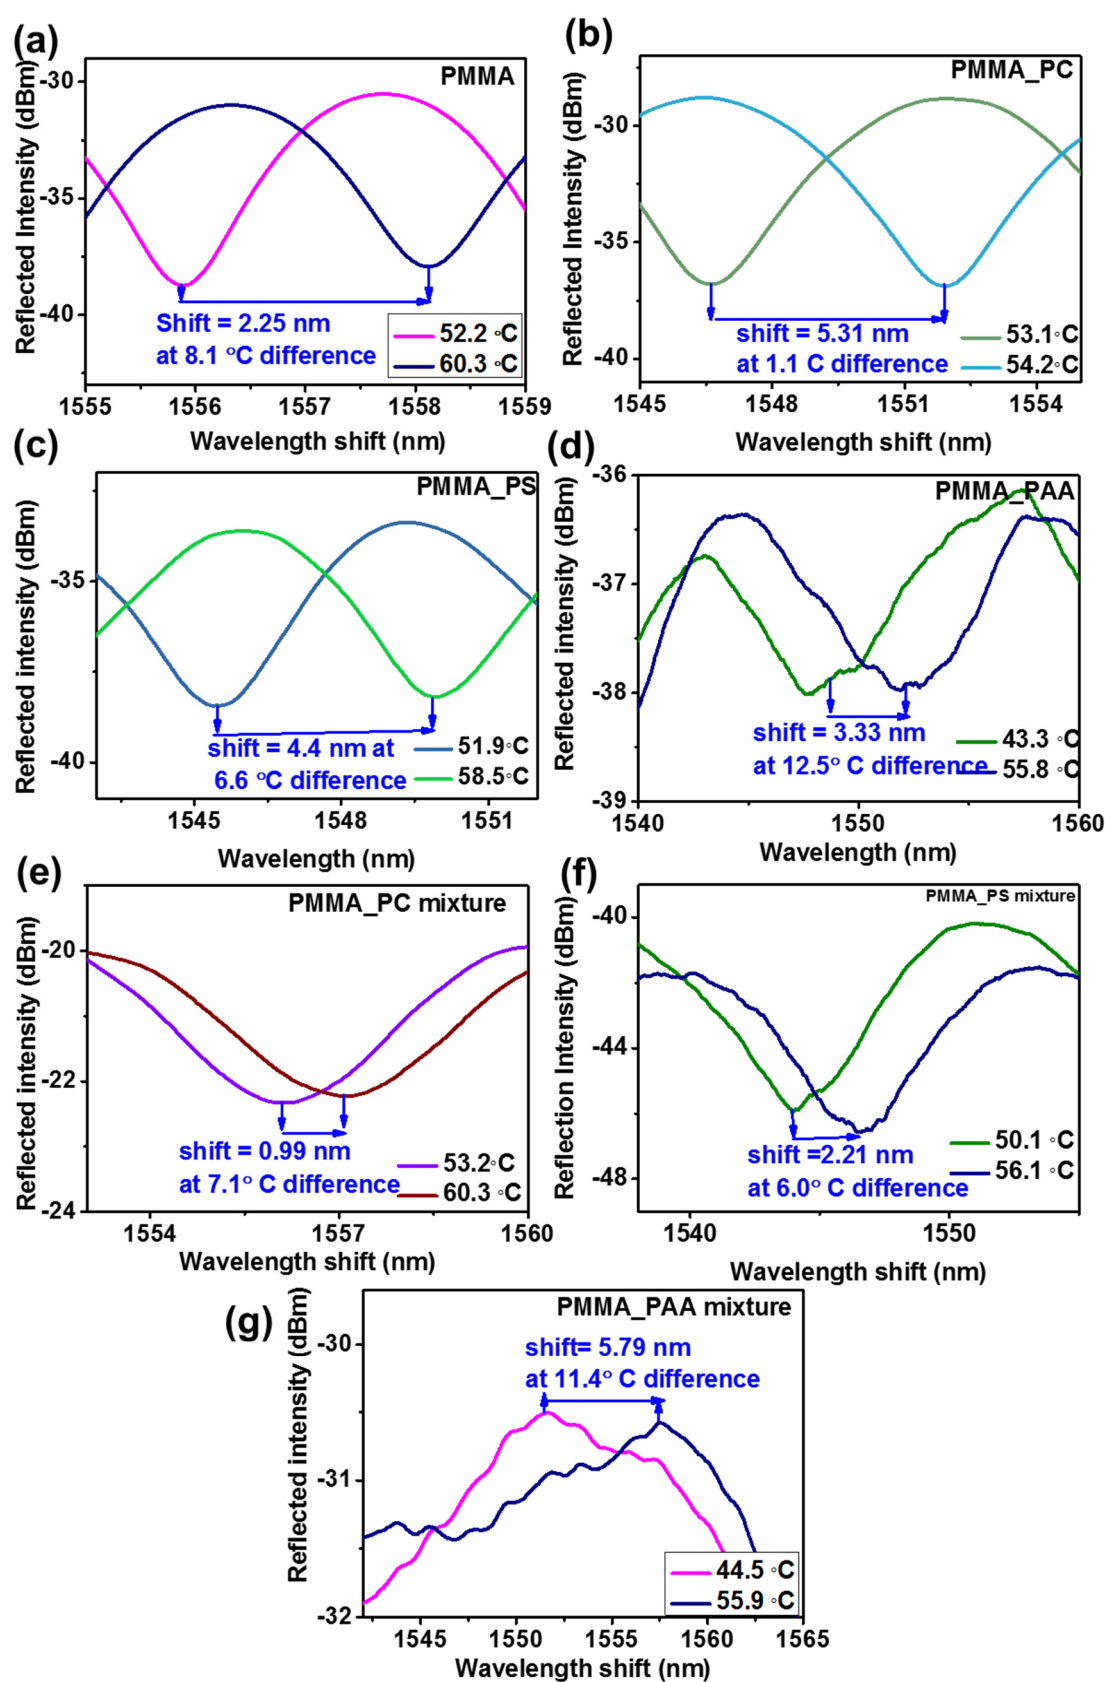

Figure S7. Comparison of the wavelength shift of FPI sensor at a particular temperature range.

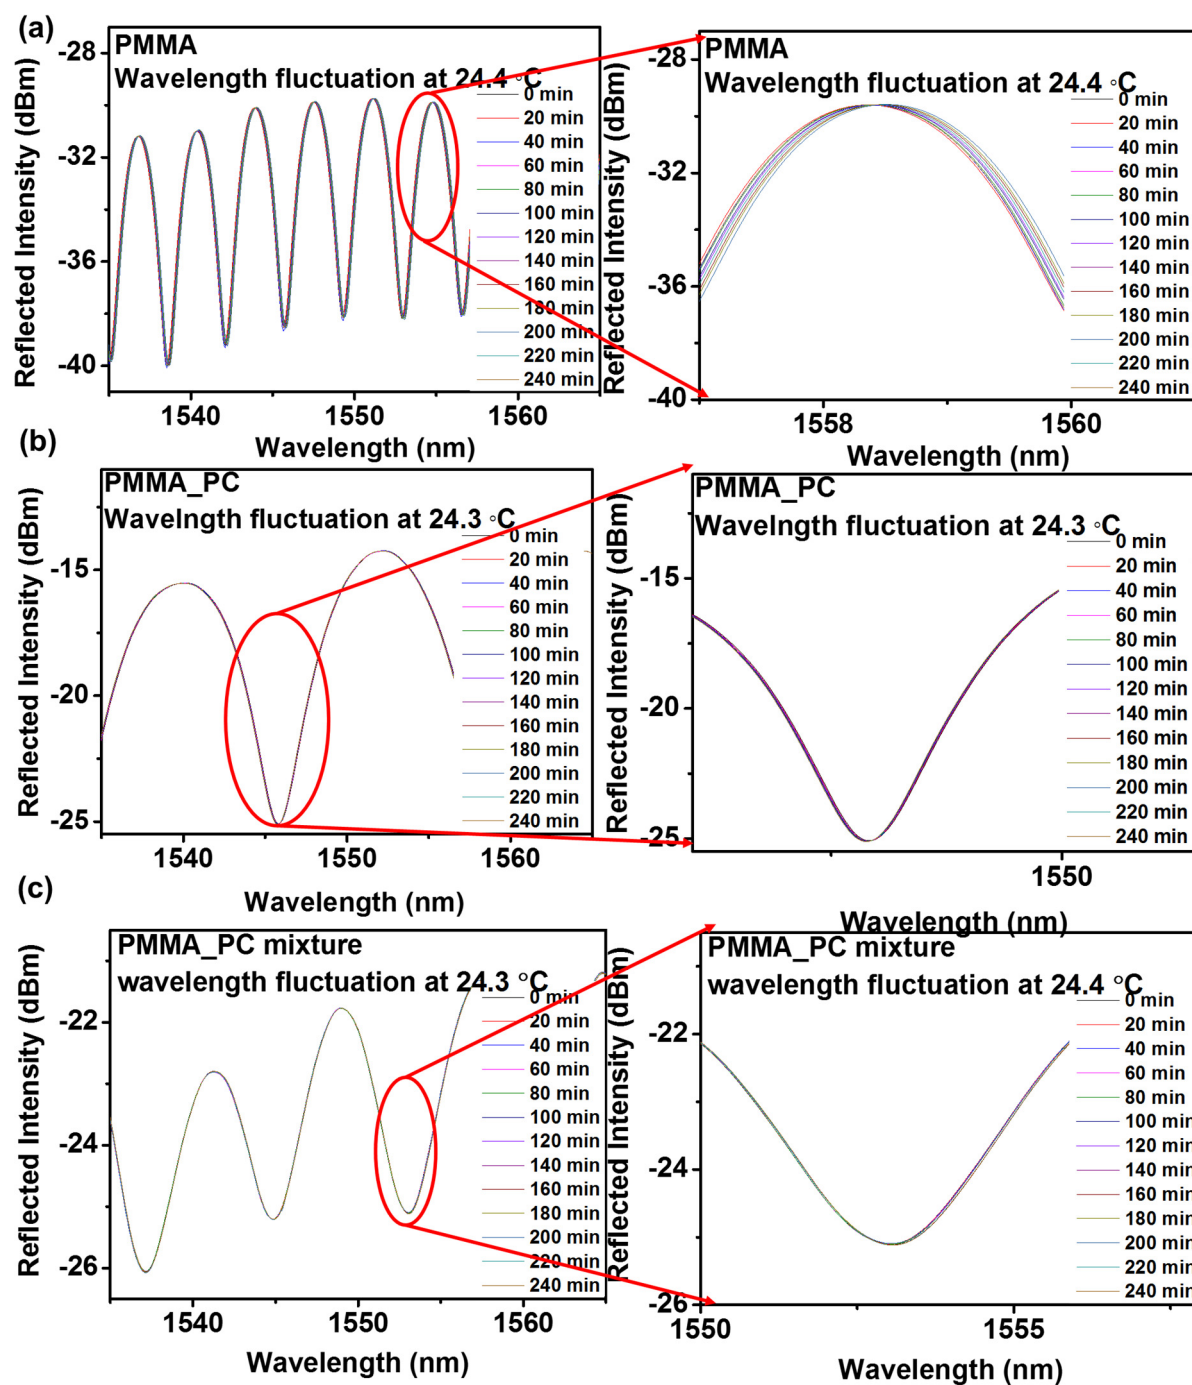

**Figure S8.** Wavelength of spectral dip response at a constant temperature and at various time intervals of (a) PMMA, (b) PMMA\_PC and PMMA-PC mixture.



**Table S1.** Comparison of sensitivities and preparation methods/complication of various fiber optic temperature sensors.

| Type of Fiber                                                  | Polymer                                                      | T(°C)          | Sensitivity (pm °C <sup>-1</sup> ) | Method                                                                                                       | Ref              |
|----------------------------------------------------------------|--------------------------------------------------------------|----------------|------------------------------------|--------------------------------------------------------------------------------------------------------------|------------------|
| Fabry–Perot Interferometer                                     | polyvinyl alcohol                                            | 25–100         | ~193.3                             | Low sensitivity, Stepper motor needed for coating                                                            | [1]              |
| Fiber Bragg grating                                            | Norland Optic Adhesive-61                                    | 10–50          | 19.5                               | Operation temperature range is small, UV curing method needed for coating the polymer                        | [2]              |
| Fiber Fizeau interferometer                                    | Norland Optic Adhesive-61                                    | 10–50          | 269.5                              | Operation temperature range is small, UV curing method needed for coating the polymer                        | [2]              |
| Fabry–Perot Interferometer                                     | Poly (vinyl chloride)                                        | 25–60          | 366.0                              | Plastic welder used for coating, low sensitivity                                                             | [3]              |
| Single mode + Hollow core fiber                                | polydimethylsiloxane                                         | 51–70.5        | 2703.5                             | expensive method, poor reproducibility, requires expensive techniques, complex method                        | [4]              |
| Microfiber mode interferometer                                 | polydimethylsiloxane                                         | 20–48          | 3101.7                             | requires expensive techniques,                                                                               | [5]              |
| Fabry–Perot Interferometer                                     | step-curing ultraviolet photoresist and polydimethylsiloxane | 20–75          | 689.68                             | Low sensitivity, UV curing method needed for coating                                                         | [6]              |
| Fabry–Perot Interferometer                                     | Polycarbonate                                                | 20–140         | 245.4                              | Low sensitivity,                                                                                             | [7]              |
| Fabry–Perot Interferometer                                     | Polystyrene                                                  | 25–100         | 439.89                             | Low sensitivity,                                                                                             | [8]              |
| Fiber Bragg grating                                            | gold-coated shallow-tapered chirped                          | 30–80          | 9.893                              | CO <sub>2</sub> laser splicing system, Gold Layer Sputtering, optical backscatter reflectometer interrogator | [9]              |
| Fiber Bragg grating +Single mode +Multimode Fiber              | –                                                            | 0–900          | 13.4                               | femtosecond laser inscription, fusion splicer                                                                | [10]             |
| Ultra-long period fiber grating + graded index multimode fiber | doping of germanium                                          | 30–150         | 90.77                              | Splicing by arc discharge, fusion splicer                                                                    | [11]             |
| <b>Fabry–Perot Interferometer</b>                              | <b>PMMA_PC</b>                                               | <b>24.4–80</b> | <b>2142.5</b>                      | <b>Simple , cheap, reproducible, high sensitivity</b>                                                        | <b>This work</b> |
| <b>Fabry–Perot Interferometer</b>                              | <b>PMMA_PS</b>                                               | <b>24.4–80</b> | <b>785.5</b>                       | <b>Simple , cheap, reproducible, high sensitivity</b>                                                        | <b>This work</b> |

**Table S2.** Comparison of the wavelength fluctuation for PMMA, PMMA\_PC and PMMA\_PC mixture sensors.

| Sensor          | Average Temperature for Wavelength Fluctuation (°C) | Standard Deviation for Temperature (°C) | Standard Deviation for Wavelength (nm) |
|-----------------|-----------------------------------------------------|-----------------------------------------|----------------------------------------|
| PMMA            | 24.4                                                | 0.0674                                  | 0.0555                                 |
| PMMA_PC         | 24.3                                                | 0.0699                                  | 0.0402                                 |
| PMMA_PC mixture | 24.3                                                | 0.0632                                  | 0.0239                                 |

## References

1. Q. Rong, H. Sun, X. Qiao, J. Zhang, M. Hu, Z. Feng, A miniature fiber-optic temperature sensor based on a Fabry–Perot interferometer, *Journal of Optics*, 14 (2012) 045002.
2. C.-L. Lee, Y.-W. You, J.-H. Dai, J.-M. Hsu, J.-S. Horng, Hygroscopic polymer microcavity fiber Fizeau interferometer incorporating a fiber Bragg grating for simultaneously sensing humidity and temperature, *Sensors and Actuators B: Chemical*, 222 (2016) 339–346.
3. Z. Zhang, C. Liao, J. Tang, Z. Bai, K. Guo, M. Hou, J. He, Y. Wang, S. Liu, F. Zhang, Y. Wang, High-Sensitivity Gas-Pressure Sensor Based on Fiber-Tip PVC Diaphragm Fabry–Pérot Interferometer, *Journal of Lightwave Technology*, 35 (2017) 4067–4071.

4. M.-q. Chen, Y. Zhao, F. Xia, Y. Peng, R.-j. Tong, High sensitivity temperature sensor based on fiber air-microbubble Fabry-Perot interferometer with PDMS-filled hollow-core fiber, *Sensors and Actuators A: Physical*, 275 (2018) 60-66.
5. I. Hernandez-Romano, D. Monzon-Hernandez, C. Moreno-Hernandez, D. Moreno-Hernandez, J. Villatoro, Highly Sensitive Temperature Sensor Based on a Polymer-Coated Microfiber Interferometer, *IEEE Photonics Technology Letters*, 27 (2015) 2591 - 2594.
6. M. Ge, Y. Li, Y. Han, Z. Xia, Z. Guo, J. Gao, S. Qu, High-sensitivity double-parameter sensor based on the fibre-tip Fabry-Pérot interferometer, *Journal of Modern Optics*, 64 (2017) 596-600.
7. T. Salunkhe Tejaswi, K. lee Ho, W. Choi Hyung, J. Park Sang, H. Kim Ji, T. Kim Il, High sensitivity temperature sensor based on Fresnel reflection with thermosensitive polymer: control of morphology and coating thickness, *Japanese Journal of Applied Physics*, 59 (2020) SGGG06-1-SGGG06-7.
8. Salunkhe, Lee, Choi, Park, I.T. Kim, Enhancing Temperature Sensitivity of the Fabry-Perot Interferometer Sensor with Optimization of the Coating Thickness of Polystyrene, *Sensors*, 20 (2020) 794.
9. T. Ayupova, M. Shaimerdenova, D. Tosi, Shallow-Tapered Chirped Fiber Bragg Grating Sensors for Dual Refractive Index and Temperature Sensing, *Sensors*, 21 (2021) 3635.
10. X. Sun, L. Zhang, L. Zeng, Y. Hu, J.-a. Duan, Micro-bending sensing based on single-mode fiber spliced multimode fiber Bragg grating structure, *Optics Communications*, 505 (2022) 127513.
11. H. Niu, W. Chen, Y. Liu, X. Jin, X. Li, F. Peng, T. Geng, S. Zhang, W. Sun, Strain, bending, refractive index independent temperature sensor based on a graded index multimode fiber embedded long period fiber grating, *Opt Express*, 29 (2021) 22922-22930.
